# Supplementary material
Source: publisher site journal article supplement (https://www.dovepress.com/article/507267)
Supplement: Supplementary file 1 [file get_supplementary_file.php]

**Supplementary Table 1**. Treatment characteristics per cohort.

| Radiation segmentectomy (n=58) | |
| --- | --- |
| Parameter | **Median (IQR 25, 75)** |
| Total angiosome volume (ml) | 138 (80, 261) |
| Dose (Gy) | 638 (544, 872) |
| Treatment activity (GBq) | 2.2 (1.2, 3.4) |
| Total microsphere number (million) | 2.8 (1.9, 4.0) |
| Specific activity (Bq)† | 703 (692, 935) |
| Microspheres per cc (thousands) | 18.2 (15.4, 24.2) |
| External beam radiation therapy (n=28) | |
| Parameter | **n (%)** |
| Modality  Photon radiation therapy  Proton beam therapy | 16 (57%)  12 (43%) |
| Dose (Gy*) | 50 (range 39-67.5) |
| Number of fractions  3  5  15 | 1 (3%)  19 (68%)  8 (29%) |
| Biologically effective dose (Gy) | 100 (range 84-100) |

Note: ml: milliliter; MIRD: Medical Internal Radiation Dose; Gy: Gray; GBq: Gigabecquerel; Bq: Becquerel; Gy*: Radiobiologic equivalent (RBE) dose for external beam.

†Specific activity assuming 2500 Bq at calibration.
